# Supplementary material for: Assessment of knowledge, attitude and practice and associated factors of blood donation among health care workers in Ethiopia: a cross-sectional study
Source: Springer Nature journal article supplement (doi:10.1186/s12878-019-0140-9), 2019-05-15
Supplement: MOESM1 [file 16726406]

## **Questionnaire**

We are working on a research entitled knowledge, attitude, and practice and associated factors towards blood donation.

You have been selected to participate in this study. The finding of the study will be used for better planning and up on intervention towards blood donation concerning the awareness, perception and practice. Therefore we are requesting you to fill this questionnaire by yourself. There is no right or wrong answer. Your response is completely confidential. You do not need to write your name and will never be used in a connection with any of the information you will give. You are kindly requested to answer every question and may stop filling at any time if you want to do so. However, your honest answers to these questions will help us better understand what people think, say and do about the blood donation. According to the questions, there might have more than one answers.

WE would greatly appreciate your help in responding to these questions. The survey will take about 30 minutes to fill this questionnaire.

Are you willing to participate? Yes/ No

Please read each questions carefully and show your answer by circling the number and writing your response on blank spaces.

Thank you in advance for your participation!

Part I: Socio-demographic questions

|     |                                                          |                        |                        |
|-----|----------------------------------------------------------|------------------------|------------------------|
| 101 | Age                                                      | .....years             |                        |
| 102 | Sex                                                      | Male                   | Female                 |
| 103 | Marital status                                           | Single                 | Divorced               |
|     |                                                          | Married                | Widowed                |
| 104 | Qualification                                            | Diploma                | 2 <sup>nd</sup> degree |
|     |                                                          | First degree           | Specialist             |
| 105 | Religion                                                 | Orthodox               |                        |
|     |                                                          | Muslim                 |                        |
|     |                                                          | Catholic               |                        |
|     |                                                          | Protestant             |                        |
|     |                                                          | Others.....            |                        |
| 106 | Duration of practice in the health facility              | .....Years/.....Months |                        |
| 107 | Department                                               | Physician              |                        |
|     |                                                          | Nursing                |                        |
|     |                                                          | Laboratory             |                        |
|     |                                                          | Pharmacy               |                        |
|     |                                                          | Physiotherapy          |                        |
|     |                                                          | Anesthesia             |                        |
| 108 | Monthly income                                           | .....birr              |                        |
| 109 | Is blood bank easily accessible around your institution? | Yes                    |                        |
|     |                                                          | No                     |                        |

Part II: knowledge on blood donation

|     |                                                                    |                                                                             |
|-----|--------------------------------------------------------------------|-----------------------------------------------------------------------------|
| 201 | Do you know common blood groups?                                   | Yes<br>No                                                                   |
| 202 | Do you know your blood group?                                      | Yes<br>No                                                                   |
| 203 | What is your blood group?                                          | A+<br>A-<br>B +<br>B -<br>AB+<br>AB-<br>O+<br>O-                            |
| 204 | Can a person be infected by receiving blood transfusion?           | Yes<br>No                                                                   |
| 205 | What diseases are transmissible by blood transfusion?(Please list) |                                                                             |
| 206 | How often an individual donate blood?                              | Weekly<br>Monthly<br>Three monthly<br>Six monthly<br>Annually<br>Don't know |
| 207 | Who should donate blood? (Please list )                            |                                                                             |

|     |                                                          |                                                                                                                     |
|-----|----------------------------------------------------------|---------------------------------------------------------------------------------------------------------------------|
| 208 | What volume of blood is collected during each donation?  | <500ml<br>500-1000ml<br>Don't know                                                                                  |
| 209 | What is the duration of a donation process?              | 20 min<br>20-60min<br>don't know                                                                                    |
| 210 | What is your source of information about blood donation? | Health facility<br>Family<br>Friends<br>Mass media<br>Training/School/College<br>Others.....<br>Have no information |

PART III: attitude on blood donation

|     |                                                                               |                                                                                       |
|-----|-------------------------------------------------------------------------------|---------------------------------------------------------------------------------------|
| 311 | What do you think about blood donation?                                       | Good<br>Bad<br>No idea                                                                |
| 312 | What do you think is the best source of blood donation?                       | Voluntary donor<br>replacement donor<br>remunerated donor<br>self-donor<br>don't know |
| 313 | Can something harmful happen to a blood donor during or after blood donation? | Yes<br>No<br>I don't know                                                             |
| 314 | What can happen to a blood donor during or after donation?                    | Contract infection<br>temporary weakness<br>fall sick                                 |

|     |                                             |                           |
|-----|---------------------------------------------|---------------------------|
| 315 | Should patient relative be asked to donate? | Yes<br>No<br>I don't know |
| 316 | Do you encourage relatives to donate?       | Yes<br>No                 |

PART IV: Practice of blood donation

|     |                                                |                                                                                                                                                                                                                                   |
|-----|------------------------------------------------|-----------------------------------------------------------------------------------------------------------------------------------------------------------------------------------------------------------------------------------|
| 401 | Have you ever donated blood in your life time? | Yes<br>No                                                                                                                                                                                                                         |
| 402 | How often do you donate in a year?             | ..... times in a year.                                                                                                                                                                                                            |
| 403 | Why did you donate?                            | A friend or relative needed blood<br>Voluntarily<br>Remunerated(paid)<br>To know my screen status                                                                                                                                 |
| 404 | Reasons for not donating by nondonors?         | Not approached to donate<br>Unfit to donate<br>Fear of needle<br>Fear of knowing my status<br>Religion forbid it<br>Donated blood may be sold<br>No remunerations(payment)<br>Need to donate to friends or relative in the future |

THANK YOU!!
